# Supplementary material for: Proton conductivity studies on two non-porous coordination complexes with different proton densities
Source: Royal Society of Chemistry journal article supplement (doi:10.1039/d2nj04435h), 2022-01-01
Supplement: d2nj04435h1.pdf [file d2nj04435h1.pdf]

## Supporting Information

### Proton conduction studies on two nonporous coordination complexes with different proton density

Ying-Bing Lu<sup>\*, a</sup>, Xue-Lian Lin<sup>a</sup>, Jia-Hao Ai<sup>a</sup>, Yu-Zheng Cai<sup>a</sup>, Shui-Qing Li<sup>a</sup>, Rong Li<sup>\*, b</sup>, Shi-Yong Zhang<sup>a</sup>, Yong-Rong Xie<sup>a</sup> and Shui-Dong Zhu<sup>\*, a</sup>

<sup>a</sup>Jiangxi Key Laboratory of Function of Materials Chemistry, College of Chemistry and Chemical Engineering, Gannan Normal University, Ganzhou, 341000, P. R. China.

<sup>b</sup>School of Metallurgy and Chemical Engineering, Jiangxi University of Science and Technology, Ganzhou 341000, Jiangxi Province, P. R. China.

<sup>c</sup>School of Materials Science & Engineering, Hubei University, Wuhan 430062, P. R. China

E-mail: ybluhm@163.com, rli@hubu.edu.cn, zsd2002@sina.com.

**Table S1.** Various coordination modes of H<sub>3</sub>CAM ligand (quoted from our previous literature<sup>1</sup>)

| Monodentate                                                                             | Didentate                                                                                               | Tridentate                                                                              |                                                                                         |                                                                                           | Tetradentate                                                                                                           |
|-----------------------------------------------------------------------------------------|---------------------------------------------------------------------------------------------------------|-----------------------------------------------------------------------------------------|-----------------------------------------------------------------------------------------|-------------------------------------------------------------------------------------------|------------------------------------------------------------------------------------------------------------------------|
| 1) 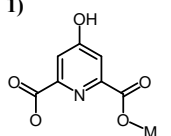  | 2)                   | 3)   | 4)   | 5)   | 6) <br><br>Complex 1<br>Complex 2 |
|                                                                                         |                                                                                                         |                                                                                         | Pendentate                                                                              |                                                                                           |                                                                                                                        |
| 7)   | 8) <br><br>Complex 1 | 9)   | 10)  | 11)  | 12)                               |
|                                                                                         |                                                                                                         |                                                                                         | Hexadentate                                                                             |                                                                                           |                                                                                                                        |
| 13)  | 14)                  | 15)  | 16)  | 17)  | 18)                               |

|             |     |             |              |            |               |
|-------------|-----|-------------|--------------|------------|---------------|
|             |     |             | Heptadentate |            |               |
| 19)         | 20) | 21)         | 22)          | 23)        | 24)           |
| Octadentate |     | Nanodentate |              | Tendentate | Dodecadentate |
| 25)         | 26) | 27)         | 28)          | 29)        | 30)           |

**Table S2.** Diverse deprotonated modes of H<sub>3</sub>CAM ligand

|                 |  |                 |                 |  |  |
|-----------------|--|-----------------|-----------------|--|--|
| L <sup>-1</sup> |  | L <sup>-2</sup> | L <sup>-3</sup> |  |  |
|                 |  |                 |                 |  |  |

**Table S3.** Selected Bond Lengths (Å) and Bond Angles (°) for **1** and **2**

| Complex 1             | Bond Lengths (Å) |                  |            |  |
|-----------------------|------------------|------------------|------------|--|
| Cu(1)-O(10)#1         | 1.8768(19)       | Cu(2)-N(2)       | 1.879(2)   |  |
| Cu(1)-N(1)            | 1.894(2)         | Cu(2)-O(4)       | 1.9008(19) |  |
| Cu(1)-O(3)            | 2.0642(19)       | Cu(2)-O(8)       | 1.9919(19) |  |
| Cu(1)-O(1)            | 1.9797(19)       | Cu(2)-O(6)       | 2.0678(19) |  |
| Cu(1)-Na(1)#2         | 3.2136(13)       | Cu(2)-O(1W)      | 2.266(2)   |  |
| Complex 1             | Bond Angles (°)  |                  |            |  |
| O(10)#1-Cu(1)-N(1)    | 169.93(9)        | N(2)-Cu(2)-O(4)  | 156.18(10) |  |
| O(10)#1-Cu(1)-O(3)    | 90.40(8)         | N(2)-Cu(2)-O(8)  | 81.83(9)   |  |
| N(1)-Cu(1)-O(3)       | 79.89(8)         | O(4)-Cu(2)-O(8)  | 89.06(8)   |  |
| O(10)#1-Cu(1)-O(1)    | 108.62(8)        | N(2)-Cu(2)-O(6)  | 79.73(8)   |  |
| N(1)-Cu(1)-O(1)       | 80.85(8)         | O(2)-Cu(2)-O(6)  | 106.10(8)  |  |
| O(3)-Cu(1)-O(1)       | 160.36(8)        | O(8)-Cu(2)-O(6)  | 160.97(8)  |  |
| O(10)#1-Cu(1)-Na(1)#2 | 52.53(6)         | N(2)-Cu(2)-O(1W) | 98.94(9)   |  |
| N(1)-Cu(1)-Na(1)#2    | 120.08(7)        | O(6)-Cu(2)-O(1W) | 86.36(8)   |  |
| Complex 2             | Bond Lengths (Å) |                  |            |  |

|                  |                        |                     |            |
|------------------|------------------------|---------------------|------------|
| Mn(1)-O(1)       | 2.0681(13)             | Mn(2)-O(6)          | 2.0741(12) |
| Mn(1)-O(8)       | 2.1920(13)             | Mn(2)-O(4)#1        | 2.1650(13) |
| Mn(1)-N(4)       | 2.2021(17)             | Mn(2)-N(8)          | 2.1723(16) |
| Mn(1)-N(2)       | 2.2039(14)             | Mn(2)-N(1)#1        | 2.2186(14) |
| Mn(1)-N(3)       | 2.2941(16)             | Mn(2)-N(7)          | 2.4921(16) |
| Mn(1)-O(7)       | 2.4548(13)             | Mn(2)-O(2)#1        | 2.5071(13) |
| <b>Complex 2</b> | <b>Bond Angles (°)</b> |                     |            |
| O(1)-Mn(1)-O(8)  | 105.99(6)              | O(6)-Mn(2)-O(4)#1   | 117.66(5)  |
| O(1)-Mn(1)-N(4)  | 149.23(6)              | O(6)-Mn(2)-N(8)     | 119.15(6)  |
| O(8)-Mn(1)-N(4)  | 99.55(6)               | O(4)#1-Mn(2)-N(8)   | 115.60(6)  |
| O(1)-Mn(1)-N(2)  | 109.34(5)              | O(6)-Mn(2)-N(1)#1   | 118.42(5)  |
| O(8)-Mn(1)-N(2)  | 72.96(5)               | O(4)#1-Mn(2)-N(1)#1 | 72.34(5)   |
| N(4)-Mn(1)-N(2)  | 94.23(6)               | N(8)-Mn(2)-N(1)#1   | 103.81(6)  |
| O(1)-Mn(1)-N(3)  | 88.30(6)               | O(6)-Mn(2)-N(7)     | 90.51(5)   |
| O(8)-Mn(1)-N(3)  | 88.91(6)               | O(4)#1-Mn(2)-N(7)   | 78.47(5)   |

Symmetry Codes for **1**, #1  $x - 1/2, -y - 7/2, z - 1/2$ ; #2  $-x + 3/2, y - 1/2, -z + 1/2$ ; #3  $-x + 3/2, y + 1/2, -z + 1/2$ ; #4  $-x + 2, -y - 3, -z + 1$ ; #5  $x - 1/2, -y - 7/2, z + 1/2$ ;

For **2**, #1 :  $x, y + 1, z$ ; B:  $x, y - 1, z$ ;

**Table S4.** Summary of *SHAPE* analysis of Cu1 and Cu2 for **1**.

| ion | label        | shape                           | symmetry   | Distortion( $\tau$ ) |
|-----|--------------|---------------------------------|------------|----------------------|
| Cu1 | PP-5         | Pentagon                        | D5h        | 23.770               |
|     | vOC-5        | Vacant octahedron               | C4v        | 4.597                |
|     | TBPY-5       | Trigonal bipyramid              | D3h        | 8.613                |
|     | <b>SPY-5</b> | <b>Spherical square pyramid</b> | <b>C4v</b> | <b>3.960</b>         |
|     | JTBPY-5      | Johnson trigonal bipyramid J12  | D3h        | 11.730               |
|     | PP-5         | Pentagon                        | D5h        | 27.800               |
|     | vOC-5        | Vacant octahedron               | C4v        | 2.727                |
| Cu2 | TBPY-5       | Trigonal bipyramid              | D3h        | 4.320                |
|     | <b>SPY-5</b> | <b>Spherical square pyramid</b> | <b>C4v</b> | <b>1.703</b>         |
|     | JTBPY-5      | Johnson trigonal bipyramid J12  | D3h        | 6.698                |

**Table S5.** H-bonding length and angle table for **1**.

| D-H...A       | d(H...A)(Å) | d(D...A)(Å) | <DHA(Å) |
|---------------|-------------|-------------|---------|
| O1W--H1WA..O3 | 2.30        | 3.048(3)    | 142     |
| O5--H3..O7    | 1.87(6)     | 2.694(3)    | 167(4)  |
| O2W--H2WA.O7  | 2.06        | 2.792(4)    | 139     |
| O2W--H2WB..O3 | 2.54        | 3.179(4)    | 129     |
| O2W--H2WB..O4 | 2.14        | 2.971(4)    | 154     |
| O1W--H1WB..O8 | 1.94        | 2.821(3)    | 175     |

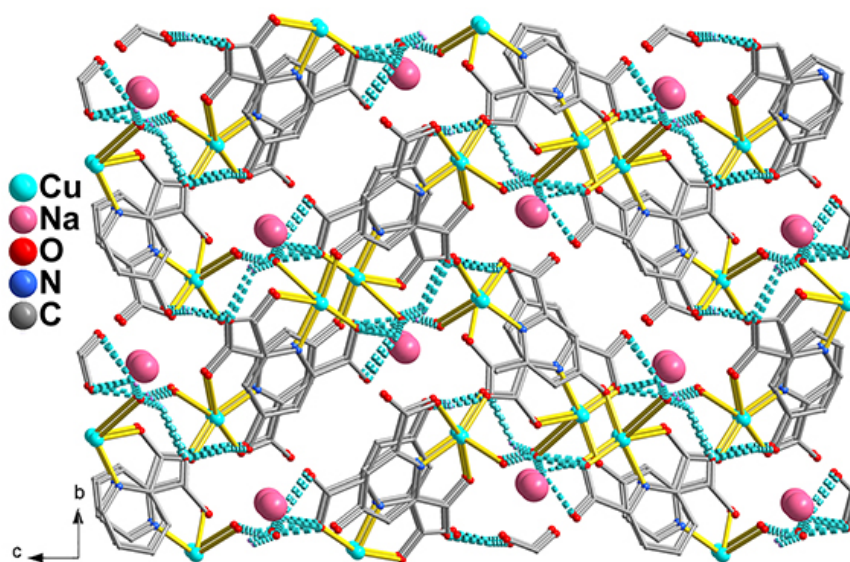

**Figure S1.** The 3D network of **1** in which the Na<sup>+</sup> cations filled in one channel along the *a* axis.

**Table S6.** Summary of *SHAPE* analysis of Mn1 and Mn2 for **2**.

| ion | label        | shape                         | symmetry   | Distortion( $\tau$ ) |
|-----|--------------|-------------------------------|------------|----------------------|
| Mn1 | HP-6         | Hexagon                       | D6h        | 33.642               |
|     | PPY-6        | Pentagonal pyramid            | C5v        | 14.648               |
|     | OC-6         | Octahedron                    | Oh         | 7.812                |
|     | <b>TPR-6</b> | <b>Trigonal prism</b>         | <b>D3h</b> | <b>6.216</b>         |
|     | JPPY-6       | Johnson pentagonal pyramid J2 | C5v        | 17.919               |
|     | HP-6         | Hexagon                       | D6h        | 32.265               |
| Mn2 | PPY-6        | Pentagonal pyramid            | C5v        | 8.193                |
|     | OC-6         | Octahedron                    | Oh         | 16.851               |
|     | <b>TPR-6</b> | <b>Trigonal prism</b>         | <b>D3h</b> | <b>5.760</b>         |
|     | JPPY-6       | Johnson pentagonal pyramid J2 | C5v        | 11.578               |

**Table S7.** H-bonding length and angle table for **2**.

| D-H...A             | d(H...A) (Å) | d(D...A) (Å) | <DHA (Å) |
|---------------------|--------------|--------------|----------|
| O(5)-H(5)...O(7)    | 1.80         | 2.6176(18)   | 173      |
| N(5)--H(5A)..O(8)   | 2.10         | 2.837(2)     | 143      |
| N(5)--H(5A) ..O(9)  | 2.60         | 3.339(2)     | 145      |
| N(6)--H(6)..O(9)    | 1.93         | 2.776(3)     | 170      |
| N(9)--H(9A)..O(3)   | 2.14         | 2.989(2)     | 167      |
| N(9)--H(9A)..O(4)   | 2.58         | 3.129(2)     | 122      |
| O(10)--H(10)..O(2)  | 1.82         | 2.6132(17)   | 161      |
| N(10)--H(10A)..O(4) | 2.17         | 2.892(2)     | 142      |

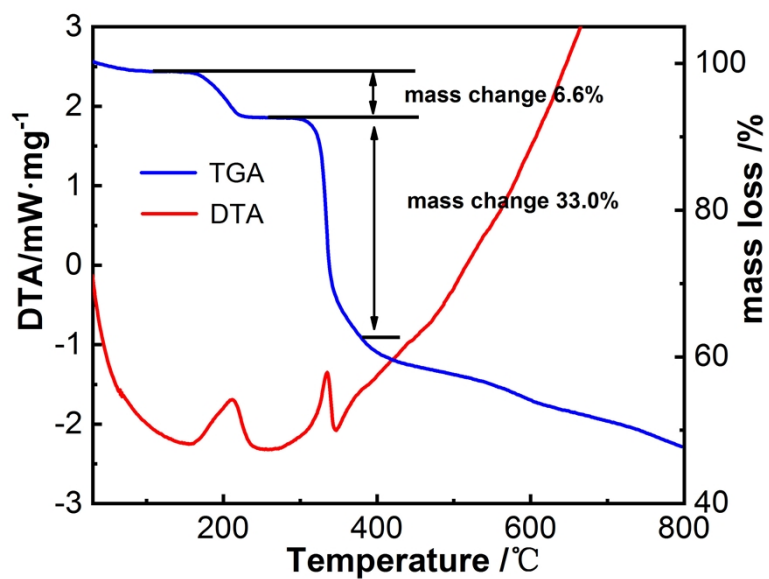

Figure S2. TGA and DTA of 1 from 30 °C to 800 °C

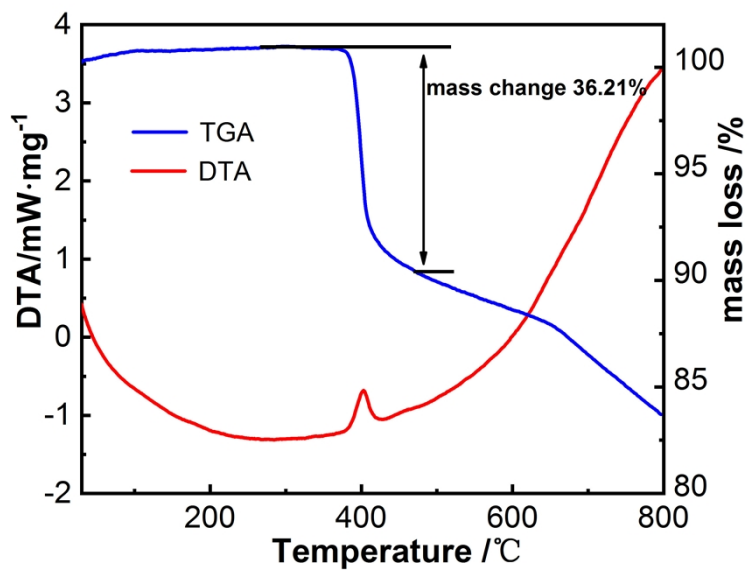

Figure S3. TGA and DTA of 2 from 30 °C to 800 °C

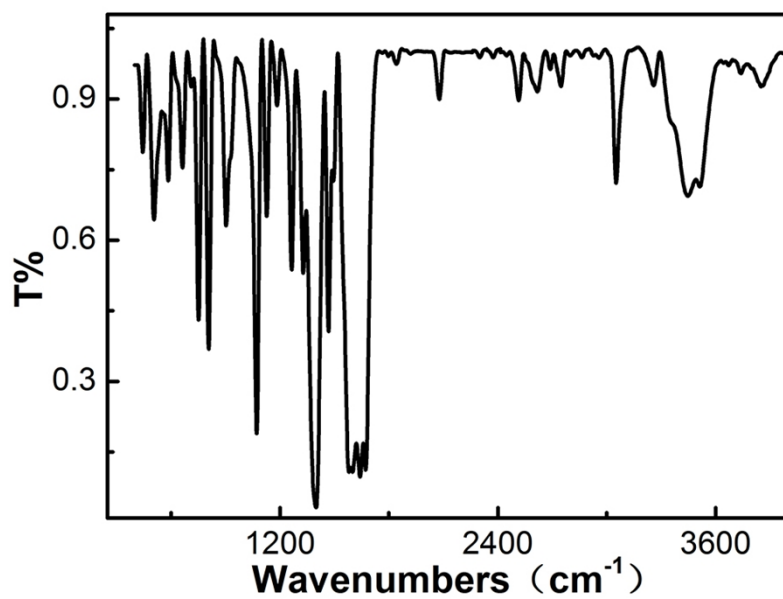

Figure S4. IR spectra for 1.

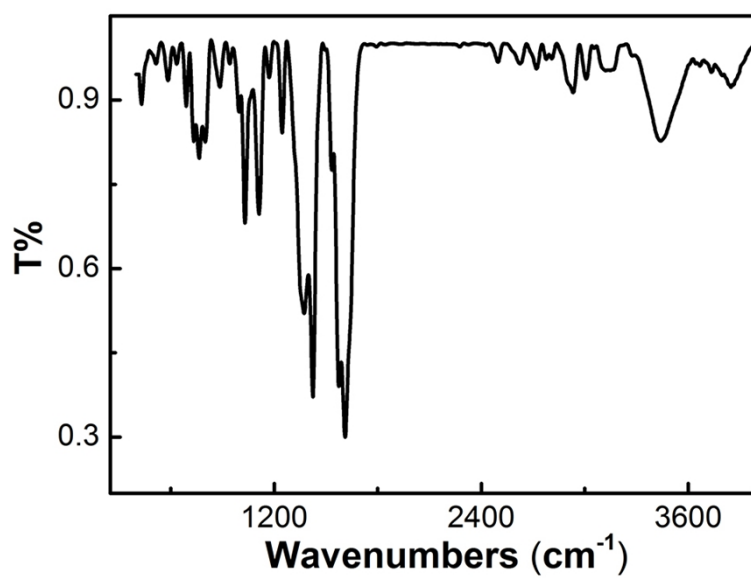

Figure S5. IR spectra for 2.

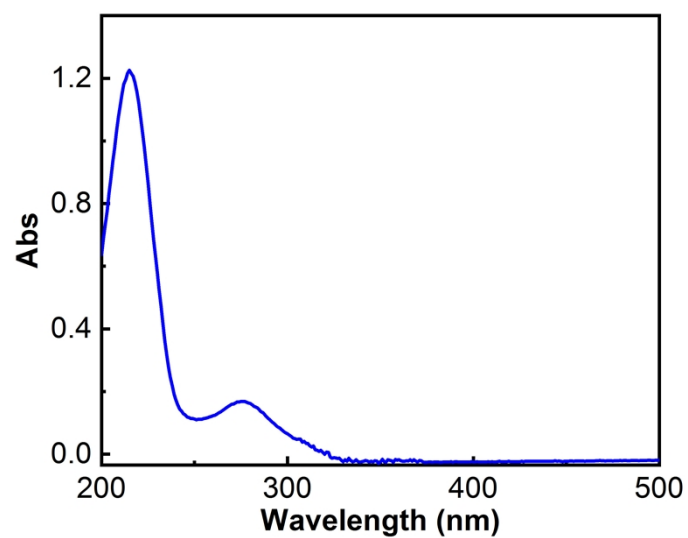

**Figure S6.** UV-vis spectra for **1**.

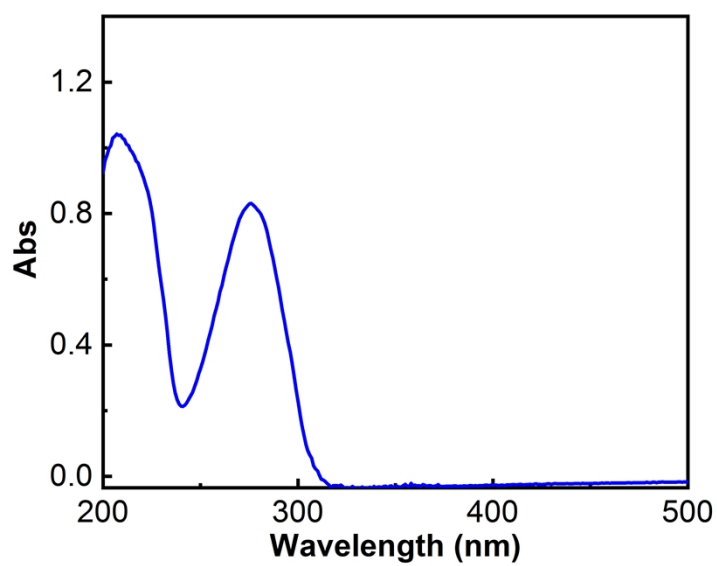

**Figure S7.** UV-vis spectra for **2**.



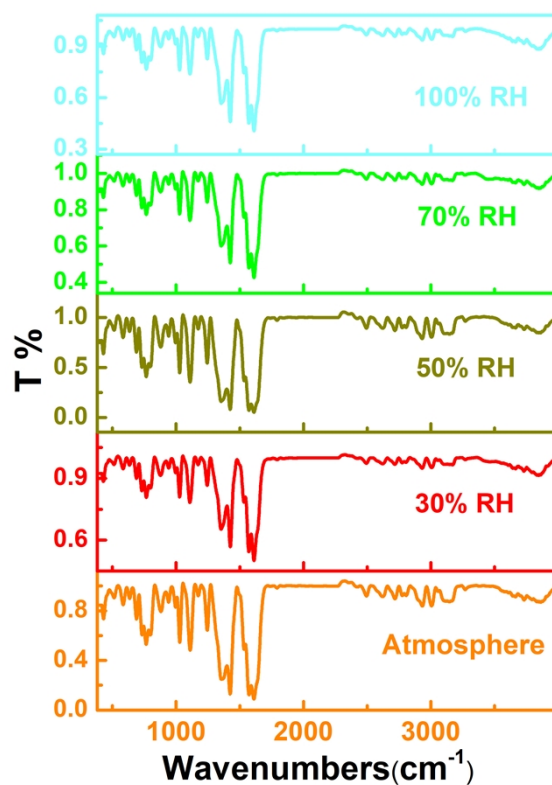

**Figure S8.** The IR spectra of **1** at 25 °C under different humidity (RH)

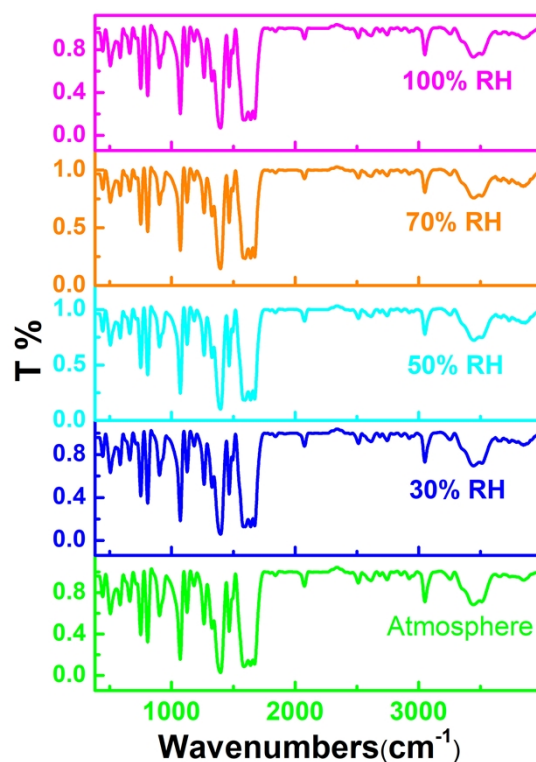

**Figure S9.** The IR spectra of **2** at 25 °C under different humidity (RH)

**Table S8.** The proton conductivity of **1** at 25 °C under variable relative humidity (RH).

| RH / % | $\sigma / \text{S cm}^{-1}$ |
|--------|-----------------------------|
| 50     | $7.10 \times 10^{-10}$      |
| 60     | $3.04 \times 10^{-9}$       |
| 70     | $2.48 \times 10^{-8}$       |
| 80     | $1.18 \times 10^{-7}$       |
| 90     | $6.52 \times 10^{-7}$       |
| 100    | $5.22 \times 10^{-6}$       |

**Table S9.** The proton conductivity of **1** at 100 % under variable temperature (°C).

| Temperature / °C | $\sigma / \text{S cm}^{-1}$ |
|------------------|-----------------------------|
| 25               | $5.22 \times 10^{-6}$       |
| 40               | $1.51 \times 10^{-5}$       |
| 55               | $2.72 \times 10^{-5}$       |
| 70               | $4.72 \times 10^{-5}$       |
| 85               | $6.72 \times 10^{-5}$       |

**Table S10.** The proton conductivity of **2** at 25°C under variable relative humidity (RH).

| RH / % | $\sigma / \text{S cm}^{-1}$ |
|--------|-----------------------------|
| 50     | $7.1 \times 10^{-10}$       |
| 60     | $1.59 \times 10^{-9}$       |
| 70     | $1.05 \times 10^{-9}$       |
| 80     | $2.16 \times 10^{-7}$       |
| 90     | $8.19 \times 10^{-7}$       |
| 100    | $3.27 \times 10^{-5}$       |

**Table S11.** The proton conductivity of **2** at 100 % under variable temperature (°C).

| Temperature / °C | $\sigma / \text{S cm}^{-1}$ |
|------------------|-----------------------------|
| 25               | $3.27 \times 10^{-5}$       |
| 40               | $4.18 \times 10^{-5}$       |
| 55               | $5.61 \times 10^{-5}$       |
| 70               | $7.05 \times 10^{-5}$       |
| 85               | $1.70 \times 10^{-4}$       |

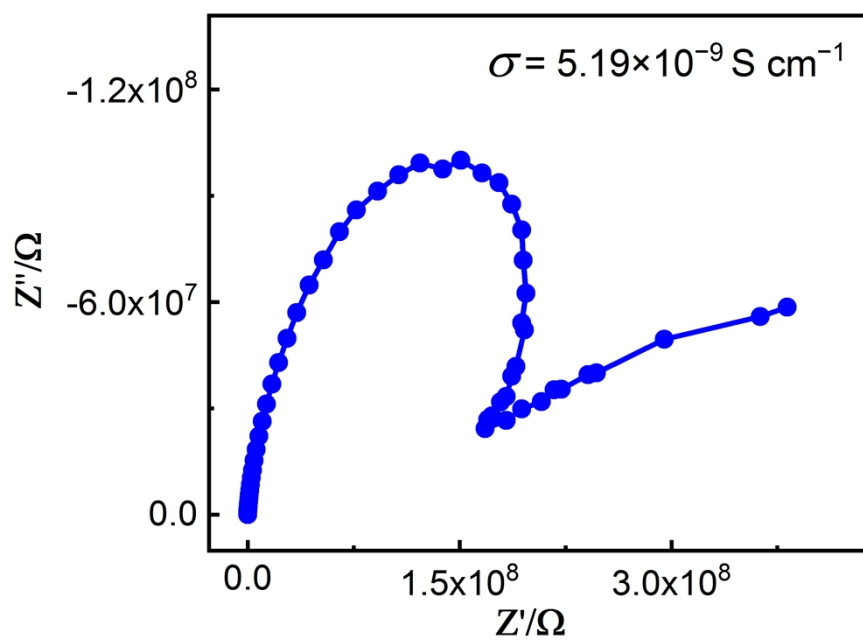

**Figure S10.** Nyquist plot for **1** at 85 °C under anhydrous condition

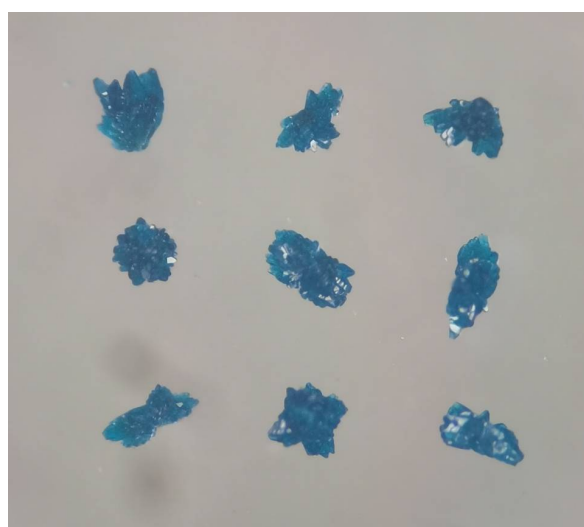

**Figure S11.** The photograph of crystals of **1** after proton conduction.

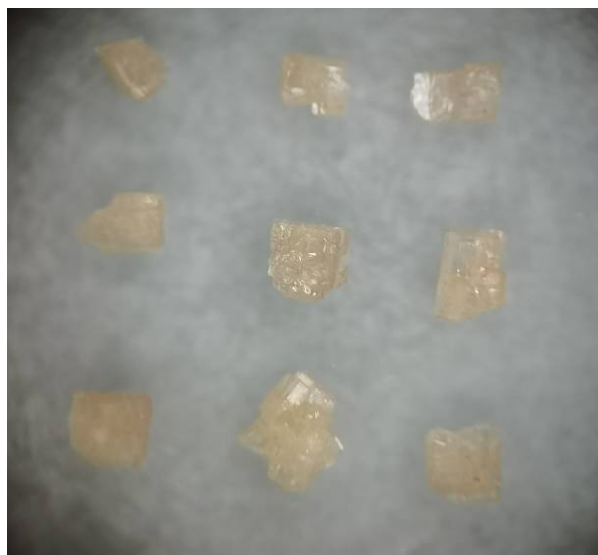

**Figure S12.** The photograph of crystals of **2** after proton conduction.

- 
- (1) Y. -B. Lu, J. Huang, X. -R. Yuan, S. -J. Liu, R. Li, H. -j. Liu, M. -P. Liu, H. -R. Wen, S. -D. Zhu and Y. -R. Xie, *Cryst. Growth. Des.*, 2022, **22**, 1045–1053.
